# Supplementary material for: Collective Motion of Spherical Bacteria
Source: PubMed Central journal article supplement (PMC3869797; doi:10.1371/journal.pone.0083760), 2013-12-20

**A**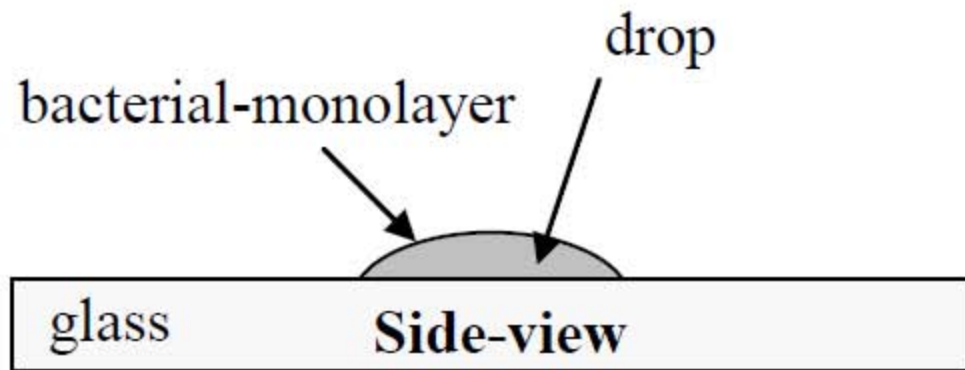**B**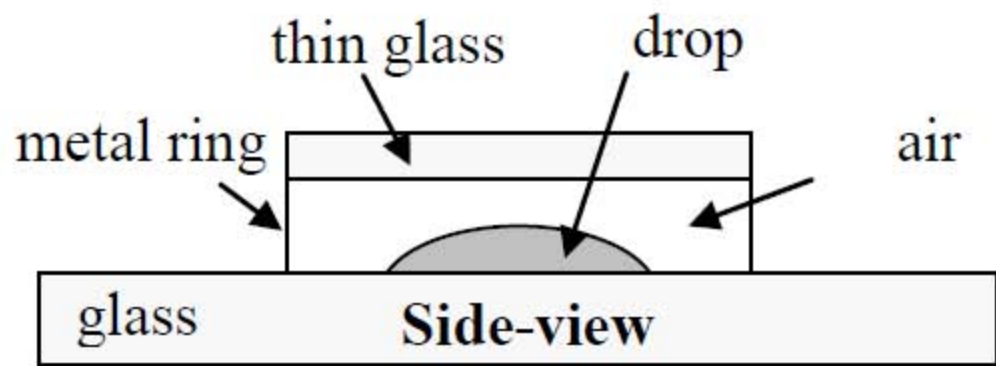**C**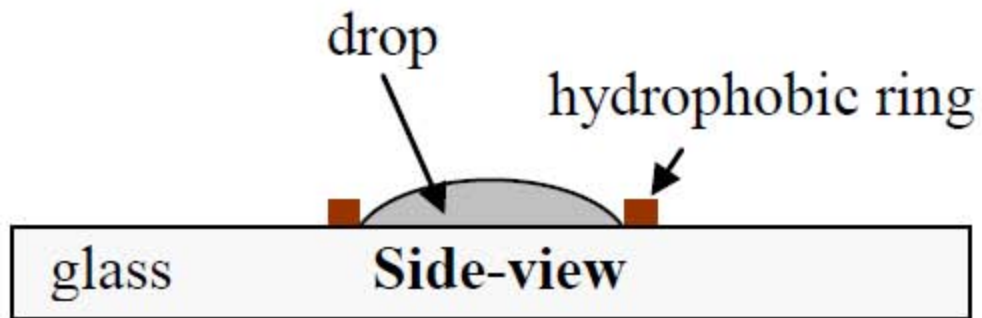**D**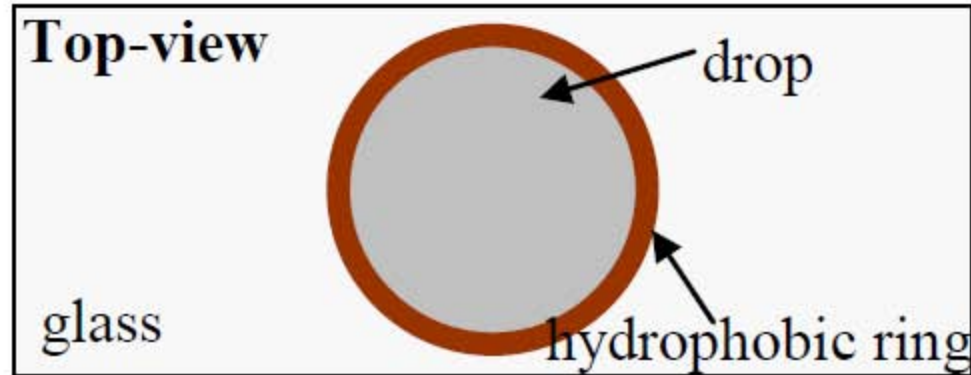

Supplement: pone.0083760.s002.pdf [file pone.0083760.s002.pdf]
